# Supplementary material for: Pd11Ni11Pt2 nanoparticles with three-phase surface enrichment for facilitating electrooxidation of ethanol and ethylene glycol
Source: Royal Society of Chemistry journal article supplement (doi:10.1039/d4qm00259h), 2024-01-01
Supplement: d4qm00259h1.pdf [file d4qm00259h1.pdf]

**Pd<sub>11</sub>Ni<sub>11</sub>Pt<sub>2</sub> nanoparticles with three-phase surface enrichment for facilitating ethanol and ethylene glycol electrooxidation**

Junming Zhang <sup>a,\*</sup>, Yao Chen <sup>a,1</sup>, Xiaojie Zhang <sup>a,1</sup>, Xianchen Xu <sup>a</sup>, Xiongfeng Ma <sup>a</sup>, Youjun Fan <sup>b,\*</sup>, Chaoyue Zhao <sup>c</sup>, He Xiao <sup>a</sup>, Man Zhao <sup>a</sup>, Tianjun Hu <sup>a</sup>, Baoliang Lv <sup>a</sup>, Ergui Luo <sup>a</sup>, Jianfeng Jia <sup>a,\*</sup>

<sup>a</sup> *Key Laboratory of Magnetic Molecules and Magnetic Information Materials of Ministry of Education, School of Chemistry and Materials Science, Shanxi Normal University, Taiyuan 030032, China*

<sup>b</sup> *Guangxi Key Laboratory of Low Carbon Energy Materials, School of Chemistry and Pharmaceutical Sciences, Guangxi Normal University, Guilin 541004, China*

<sup>c</sup> *Dalian National Laboratory for Clean Energy (DNL), Dalian Institute of Chemical Physics, Chinese Academy of Sciences, Dalian 116023, China*

---

\* Corresponding authors.

E-mail addresses: zhangjunming@sxnu.edu.cn (J. Zhang), youjunfan@mailbox.gxnu.edu.cn (Y. Fan), jiajf@dns.sxnu.edu.cn (J. Jia).

<sup>1</sup> These authors contributed equally to the work.

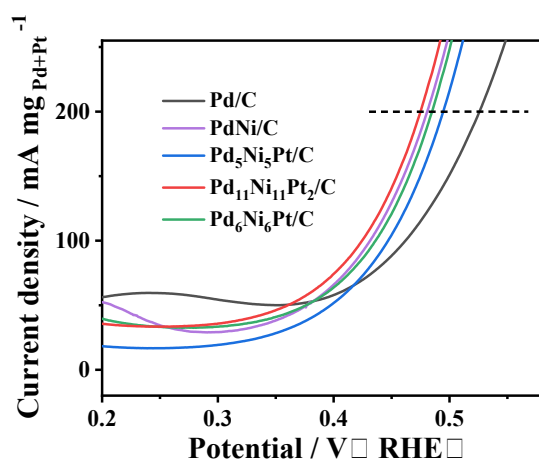

Figure S1. local magnification of the curves during the initial period of EOR in figure 5b.

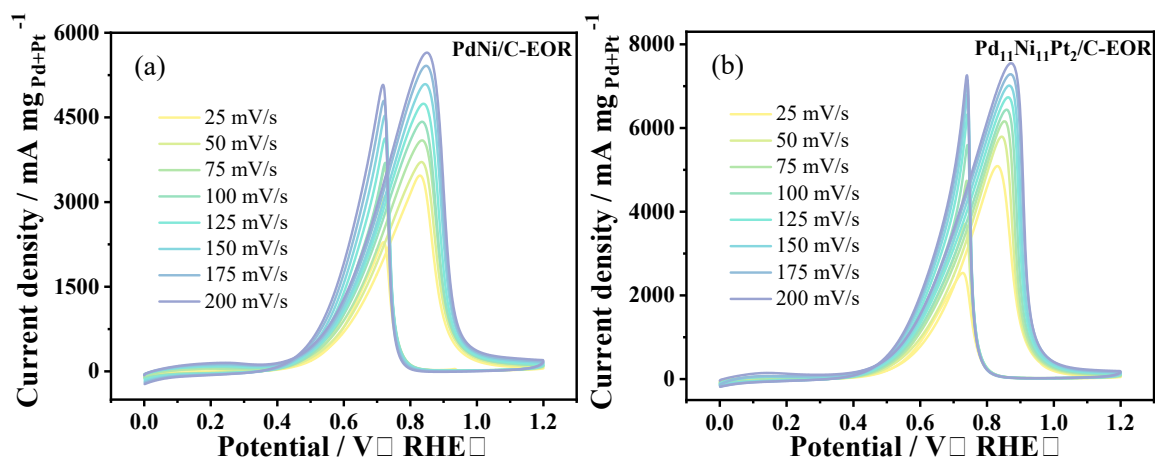

Figure S2. CV curves of EOR on PdNi/C and Pd<sub>11</sub>Ni<sub>11</sub>Pt<sub>2</sub>/C catalysts at different scan rates (25~200 mV/s).

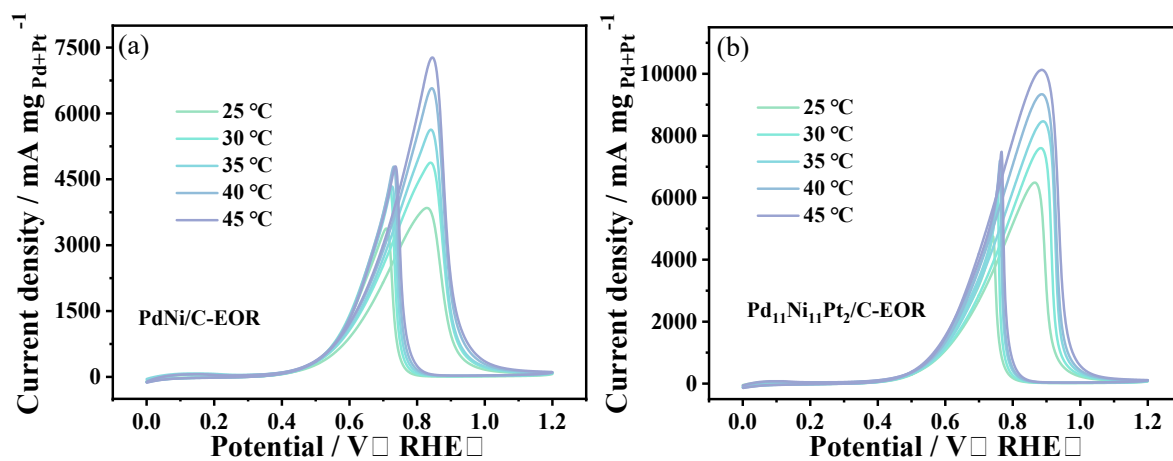

Figure S3. CV curves of EOR on PdNi/C (a) and Pd<sub>11</sub>Ni<sub>11</sub>Pt<sub>2</sub>/C (b) catalysts at various temperatures recorded in 1.0 M ethanol + 1.0 M KOH solution.

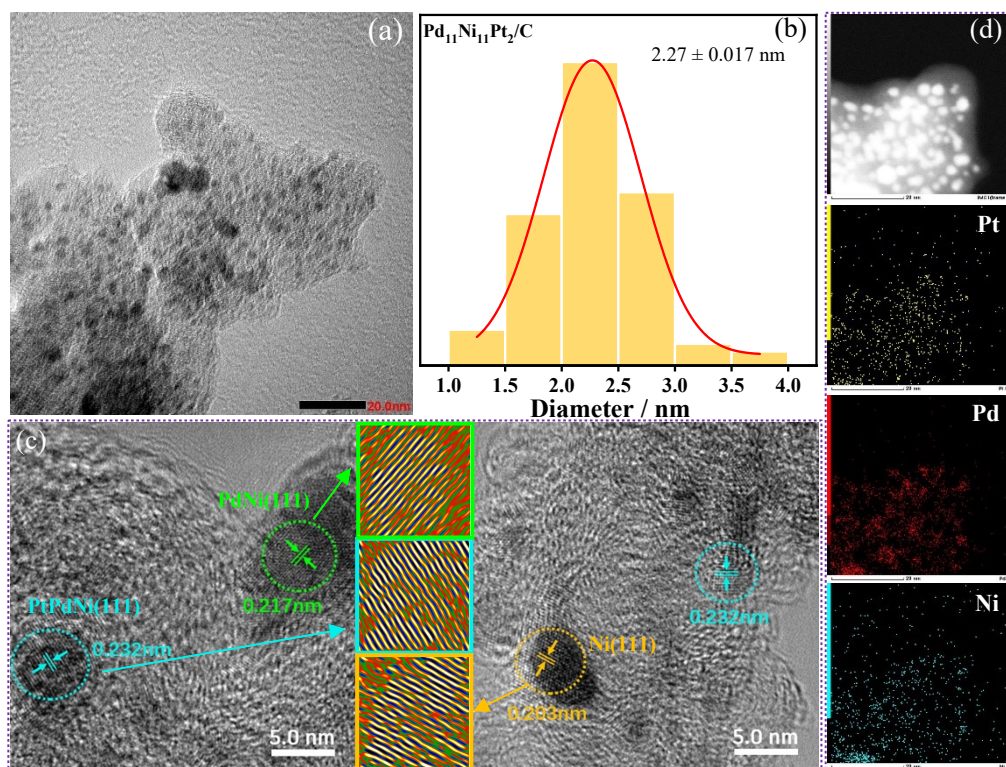

Figure S4.  $\text{Pd}_{11}\text{Ni}_{11}\text{Pt}_2/\text{C}$ -P sample: (a) Representative TEM images. (b) The corresponding size distribution histogram. (c) High-resolution TEM image and lattice fringes in the crystalline area. (d) Elemental mapping of Pt, Pd, and Ni elements of the  $\text{Pd}_{11}\text{Ni}_{11}\text{Pt}_2/\text{C}$ -P sample.

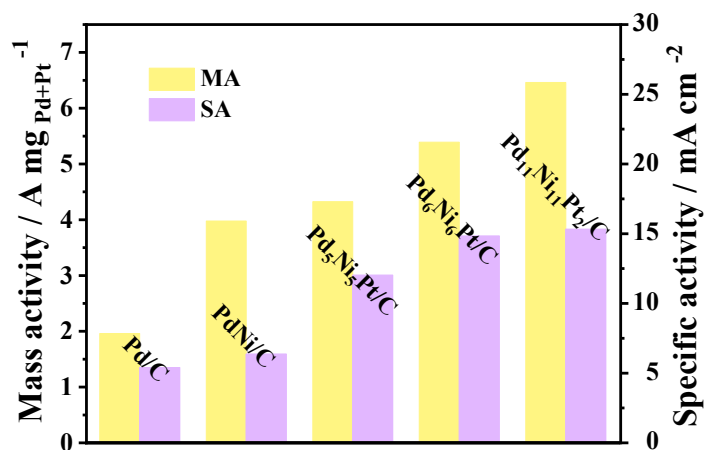

Figure S5. EOR electrocatalysis: Comparison of specific and mass activities of the five Pd-based catalysts.

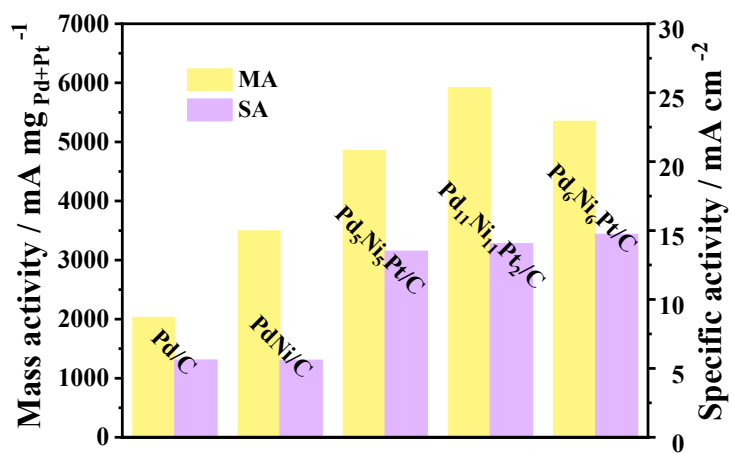

Figure S6. EGOR electrocatalysis: Histograms of specific and mass activities.

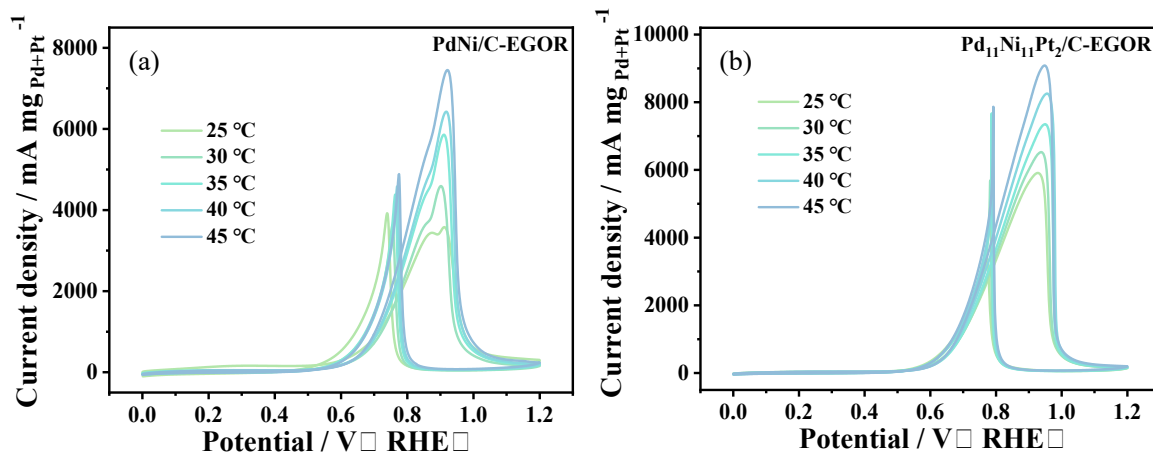

Figure S7. CV curves of EGOR on PdNi/C (a) and Pd<sub>11</sub>Ni<sub>11</sub>Pt<sub>2</sub>/C (b) catalysts at various temperatures recorded in 1.0 M EG + 1.0 M KOH solution.



Table S1. Comparison the performance of the Pd<sub>11</sub>Ni<sub>11</sub>Pt<sub>2</sub>/C catalyst with some catalysts reported recently for the EOR.

| Sample                                                 | electrolyte solution       | MA (mA mg <sub>Pd</sub> <sup>-1</sup> ) | SA (mA cm <sup>-2</sup> ) | Ref.      |
|--------------------------------------------------------|----------------------------|-----------------------------------------|---------------------------|-----------|
| Pd <sub>11</sub> Ni <sub>11</sub> Pt <sub>2</sub> /C   | 1.0 M KOH + 1.0 M ethanol  | 6461                                    | 15.32                     | This work |
| SAW-Pd MAs                                             | 1.0 M KOH + 1.0 M ethanol  | 5290                                    | 10.9                      | [1]       |
| Pd <sub>2</sub> Sn-s@Pt                                | 1.0 M KOH + 1.0 M ethanol  | 4750                                    | 20.14                     | [2]       |
| PdBi NR/C                                              | 1.0 M KOH + 1.0 M ethanol  | 3210                                    | 4.33                      | [3]       |
| RhCu NDs/CB                                            | 0.1 M KOH + 1.0 M ethanol  | 472.4                                   | 0.47                      | [4]       |
| m-PtPb NSs                                             | 1.0 M KOH + 1.0 M ethanol  | 1233.7                                  | 1.17                      | [5]       |
| AgAu-40/CF                                             | 1.0 M KOH + 1.0 M ethanol  | 1834                                    | /                         | [6]       |
| Pd <sub>79</sub> Au <sub>20</sub> Pt <sub>9</sub>      | 1.0 M KOH + 1.0 M ethanol  | 4910                                    | /                         | [7]       |
| PdPtNi                                                 | 1.0 M KOH + 1.0 M ethanol  | 6210                                    | 5.6                       | [8]       |
| PdCuSn                                                 | 1.0 M KOH + 1.0 M ethanol  | 6220                                    | 9.1                       | [9]       |
| PdCuNi/C                                               | 1.0 M KOH + 1.0 M ethanol  | 3740                                    | /                         | [10]      |
| Pt <sub>70</sub> Pd <sub>24</sub> Ni <sub>6</sub> /rGO | 1.0 M NaOH + 0.5 M ethanol | 3620                                    | ~75                       | [11]      |
| PtPdNi/CMK-3                                           | 0.1 M NaOH + 1.0 M ethanol | 302                                     | /                         | [12]      |
| PtPdNiCu                                               | 1.0 M KOH + 1.0 M ethanol  | 1019                                    | .153.18                   | [13]      |

Table S2. Comparison the performance of the Pd<sub>11</sub>Ni<sub>11</sub>Pt<sub>2</sub>/C catalyst with some catalysts reported recently for the EGOR.

| Sample                                                 | electrolyte solution  | MA (mA mg <sub>Pd</sub> <sup>-1</sup> ) | SA (mA cm <sup>-2</sup> ) | Ref.      |
|--------------------------------------------------------|-----------------------|-----------------------------------------|---------------------------|-----------|
| Pd <sub>11</sub> Ni <sub>11</sub> Pt <sub>2</sub>      | 1.0 M KOH + 1.0 M EG  | 5922                                    | 14.04                     | This work |
| coral-like Pd network                                  | 1.0 M KOH + 0.5 M EG  | 1785                                    | 8.81                      | [14]      |
| Pd <sub>6</sub> Bi <sub>1</sub> TNWs                   | 1.0 M KOH + 1.0 M EG  | 3047                                    | 7.04                      | [15]      |
| RhCu nanoboxes                                         | 1.0 M KOH + 1.0 M EG  | 775.1                                   | 1.54                      | [16]      |
| Pd <sub>7</sub> Ni <sub>3</sub>                        | 1.0 M KOH + 1.0 M EG  | 2435.0                                  | 19.2                      | [17]      |
| PtRh <sub>0.02</sub> @Rh                               | 0.1 M KOH + 0.5 M EG  | 1250                                    | 6                         | [18]      |
| Pt <sub>56</sub> Rh <sub>44</sub>                      | 0.5 M KOH + 0.5 M EG  | 1498.9                                  | 4.05                      | [19]      |
| Pd-PdSe HNSs                                           | 1.0 M KOH + 1.0 M EG  | 8600                                    | 15.7                      | [20]      |
| fcc-2H-fcc Au@Pd                                       | 0.5 M KOH + 0.5 M EG  | 5400                                    | 10.9                      | [21]      |
| Pd/CoTe-C                                              | 1.0 M KOH + 1.0 M EG  | 3917.3                                  | /                         | [22]      |
| Pt <sub>70</sub> Pd <sub>24</sub> Ni <sub>6</sub> /rGO | 1.0 M NaOH + 0.5 M EG | 7750                                    | ~130                      | [11]      |
| Pt <sub>32</sub> Pd <sub>48</sub> Ni <sub>20</sub>     | 0.5 M KOH + 0.5 M EG  | 9770                                    | /                         | [23]      |
| PtRuPd                                                 | 0.5 M KOH + 0.5 M EG  | 1368                                    | 116.11                    | [24]      |

## References

- [1] H. Wang, H. Zheng, L. Ling, Q. Fang, L. Jiao, L. Zheng, Y. Qin, Z. Luo, W. Gu, W. Song, C. Zhu, Pd Metallene Aerogels with Single-Atom W Doping for Selective Ethanol Oxidation, *ACS Nano*, 2022, **16**, 21266-21274.
- [2] T. Li, Q. Wang, W. Zhang, H. Li, Y. Wang, J. Liu, Length-Tunable Pd<sub>2</sub>Sn@Pt Core-Shell Nanorods for Enhanced Ethanol Electrooxidation with Concurrent Hydrogen Production, *Chem. Sci.*, 2023, **14**, 9488-9495.
- [3] Y. Wang, M. Li, Z. Yang, W. Lai, J. Ge, M. Shao, Y. Xiang, X. Chen, H. Huang, A Universal Synthesis of Ultrathin Pd-Based Nanorings for Efficient Ethanol Electrooxidation, *Mater. Horizons*, 2023, **10**, 1416-1424.
- [4] D. Liu, Z. Zhu, J. Li, L. W. Chen, H. Z. Huang, X. T. Jing, A. X. Yin, Rh-Cu Alloy Nano-Dendrites with Enhanced Electrocatalytic Ethanol Oxidation Activity, *J. Energy Chem.*, 2023, **82**, 343-349.
- [5] W. Ao, H. Ren, C. Cheng, Z. Fan, P. Yin, Q. Qin, Q. Zhang, L. Dai, Mesoporous PtPb Nanosheets as Efficient Electrocatalysts for Hydrogen Evolution and Ethanol Oxidation, *Angew. Chem. Int. Ed.*, 2023, **62**, e202305158.
- [6] C. Wang, D. Bukhvalov, M. C. Goh, Y. Du, X. Yang, Hierarchical AgAu Alloy Nanostructures for Highly Efficient Electrocatalytic Ethanol Oxidation, *Chinese J. Catal.*, 2022, **43**, 851-861.
- [7] K. Guo, Y. Teng, R. Guo, Y. Meng, D. Fan, Q. Hao, Y. Zhang, Y. Li, D. Xu, Engineering Ultrathin PdAu Nanoring Via a Facile Process for Electrocatalytic Ethanol Oxidation, *J. Colloid Interface Sci.*, 2022, **628**, 53-63.
- [8] D. Wang, Y. Zhang, K. Zhang, X. Wang, C. Wang, Z. Li, F. Gao, Y. Du, Rapid Synthesis of Palladium-Platinum-Nickel Ultrathin Porous Nanosheets with High Catalytic Performance for Alcohol Electrooxidation, *J. Colloid Interface Sci.*, 2023, **650**, 350-357.
- [9] M. Zhou, J. Liu, C. Ling, Y. Ge, B. Chen, C. Tan, Z. Fan, J. Huang, J. Chen, Z. Liu, Z. Huang, J. Ge, H. Cheng, Y. Chen, L. Dai, P. Yin, X. Zhang, Q. Yun, J. Wang, H. Zhang, Synthesis of Pd<sub>3</sub>Sn and PdCuSn Nanorods with L<sub>12</sub> Phase for Highly Efficient Electrocatalytic Ethanol Oxidation, *Adv. Mater.*, 2021, **34**, 2106115.
- [10] S. Zhang, A. Pei, G. Li, L. Zhu, G. Li, F. Wu, S. Lin, W. Chen, B. H. Chen, R. Luque,

Pd/CuO-Ni(OH)<sub>2</sub>/C as a Highly Efficient and Stable Catalyst for the Electrocatalytic Oxidation of Ethanol, *Green Chem.*, 2022, **24**, 2438-2450.

- [11] K. Bhunia, S. Khilari, D. Pradhan, Monodispersed PtPdNi Trimetallic Nanoparticles-Integrated Reduced Graphene Oxide Hybrid Platform for Direct Alcohol Fuel Cell, *ACS Sustain. Chem. Eng.*, 2018, **6**, 7769-7778.
- [12] J. J. Arroyo-Gómez, D. Barrera, R. M. Castagna, J. M. Sieben, A. E. Alvarez, M. M. E. Duarte, K. Sapag, PtPdNi Catalysts Supported on Porous Carbon for Ethanol Electro-Oxidation, *ChemCatChem*, 2019, **11**, 3451-3464.
- [13] Y. G. Feng, H. J. Niu, L. P. Mei, J. J. Feng, K. M. Fang, A. J. Wang, Engineering 3D Hierarchical Thorn-Like PtPdNiCu Alloyed Nanotripods with Enhanced Performances for Methanol and Ethanol Electrooxidation, *J. Colloid Interface Sci.*, 2020, **575**, 425-432.
- [14] Z. Dong, X. Jiang, W. Zhang, J. Wang, G. R. Xu, Z. Wu, G. Li, L. Wang, Organic Phosphoric Acid Induced Coral-Like Palladium Network Nanostructures for Superior Polyhydric Alcohols Electrocatalysis, *J. Colloid Interface Sci.*, 2022, **623**, 1122-1131.
- [15] X. Lao, Z. Li, L. Yang, B. Zhang, W. Ye, A. Fu, P. Guo, Monodispersed Ultrathin Twisty PdBi Alloys Nanowires Assemblies with Tensile Strain Enhance C<sub>2</sub><sup>+</sup> Alcohols Electrooxidation, *J. Energy Chem.*, 2023, **79**, 279-290.
- [16] B. Qiao, T. Yang, S. Shi, N. Jia, Y. Chen, X. Chen, Z. An, P. Chen, Highly Active Hollow RhCu Nanoboxes toward Ethylene Glycol Electrooxidation, *Small*, 2021, **17**, 2006534.
- [17] J. Shu, J. Yuan, S. Xie, R. Yue, R. Zhang, J. Xu, Robust Poly(3,4-Ethylenedioxythiophene) Granules Loaded Cu/Ni-Doped Pd Catalysts for High-Efficiency Electrooxidation of Ethylene Glycol, *J. Colloid Interface Sci.*, 2022, **628**, 745-757.
- [18] X. Jiang, Z. Dong, Q. Zhang, G.R. Xu, J. Lai, Z. Li, L. Wang, Decoupled Hydrogen Evolution from Water/Seawater Splitting by Integrating Ethylene Glycol Oxidation on PtRh<sub>0.02</sub>@Rh Nanowires with Rh Atom Modification, *J. Mater. Chem. A*, 2022, **10**, 20571-20579.
- [19] Y. X. Xie, S. Y. Cen, Y. T. Ma, H. Y. Chen, A. J. Wang, J. J. Feng, Facile Synthesis of Platinum-Rhodium Alloy Nanodendrites as an Advanced Electrocatalyst for Ethylene Glycol Oxidation and Hydrogen Evolution Reactions, *J. Colloid Interface Sci.*, 2020, **579**, 250-257.
- [20] Y. Qin, W. Zhang, F. Wang, J. Li, J. Ye, X. Sheng, C. Li, X. Liang, P. Liu, X. Wang, X. Zheng, Y. Ren, C. Xu, Z. Zhang, Extraordinary p-d Hybridization Interaction in

Heterostructural Pd-PdSe Nanosheets Boosts C-C Bond Cleavage of Ethylene Glycol Electrooxidation, *Angew. Chem. Int. Ed.*, 2022, **61**, e202200899.

- [21] X. Zhou, Y. Ma, Y. Ge, S. Zhu, Y. Cui, B. Chen, L. Liao, Q. Yun, Z. He, H. Long, L. Li, B. Huang, Q. Luo, L. Zhai, X. Wang, L. Bai, G. Wang, Z. Guan, Y. Chen, C. S. Lee, J. Wang, C. Ling, M. Shao, Z. Fan, H. Zhang, Preparation of Au@Pd Core-Shell Nanorods with fcc-2H-fcc Heterophase for Highly Efficient Electrocatalytic Alcohol Oxidation, *J. Am. Chem. Soc.*, 2021, **144**, 547-555.
- [22] F. Ren, Z. Zhang, Z. Liang, Y. Shen, X. Wang, Q. Chen, Y. Du, Fabrication of Cobaltous Telluride and Carbon Composite as a Promising Carrier for Boosting Electro Oxidation of Ethylene Glycol on Palladium in Alkaline Medium, *J. Colloid Interface Sci.*, 2022, **616**, 316-325.
- [23] J. Lai, F. Lin, Y. Tang, P. Zhou, Y. Chao, Y. Zhang, S. Guo, Efficient Bifunctional Polyalcohol Oxidation and Oxygen Reduction Electrocatalysts Enabled by Ultrathin PtPdM (M= Ni, Fe, Co) Nanosheets, *Adv. Energy Mater.*, 2019, **9**, 1800684.
- [24] J. J. Duan, X. X. Zheng, H. J. Niu, J. J. Feng, Q. L. Zhang, H. Huang, A. J. Wang, Porous Dendritic PtRuPd Nanospheres with Enhanced Catalytic Activity and Durability for Ethylene Glycol Oxidation and Oxygen Reduction Reactions, *J. Colloid Interface Sci.*, 2020, **560**, 467-474.
